# Supplementary material
Source: publisher figshare collection journal article supplement (https://acs.figshare.com/ndownloader/files/5731440)
Supplement: Supplementary file 1 [file 5731440]

 
data_yill 
 
_audit_creation_method            SHELXL-97 
_chemical_name_systematic 
; 
 ? 
; 
_chemical_name_common             'cellulose' 
_chemical_melting_point           ? 
_chemical_formula_moiety          ? 
_chemical_formula_sum 
 'C12 H14 O10' 
_chemical_formula_weight          318.23 
 
loop_ 
 _atom_type_symbol 
 _atom_type_description 
 _atom_type_scat_dispersion_real 
 _atom_type_scat_dispersion_imag 
 _atom_type_scat_source 
 'C'  'C'   0.0033   0.0016 
 'International Tables Vol C Tables 4.2.6.8 and 6.1.1.4' 
 'H'  'H'   0.0000   0.0000 
 'International Tables Vol C Tables 4.2.6.8 and 6.1.1.4' 
 'O'  'O'   0.0106   0.0060 
 'International Tables Vol C Tables 4.2.6.8 and 6.1.1.4' 
 
_symmetry_cell_setting            'P21' 
_symmetry_space_group_name_H-M    ? 
 
loop_ 
 _symmetry_equiv_pos_as_xyz 
 'x, y, z' 
 '-x, -y, z+1/2' 
 
_cell_length_a                    7.784(8) 
_cell_length_b                    8.201(8) 
_cell_length_c                    10.380(10) 
_cell_angle_alpha                 90.00 
_cell_angle_beta                  90.00 
_cell_angle_gamma                 96.55(5) 
_cell_volume                      658.3(11) 
_cell_formula_units_Z             2 
_cell_measurement_temperature     293(2) 
_cell_measurement_reflns_used     310 
_cell_measurement_theta_min       2.54 
_cell_measurement_theta_max       21.10 
 
_exptl_crystal_description        ? 
_exptl_crystal_colour             ? 
_exptl_crystal_size_max           ? 
_exptl_crystal_size_mid           ? 
_exptl_crystal_size_min           ? 
_exptl_crystal_density_meas       ? 
_exptl_crystal_density_diffrn     1.605 
_exptl_crystal_density_method     'not measured' 
_exptl_crystal_F_000              332 
_exptl_absorpt_coefficient_mu     0.143 
_exptl_absorpt_correction_type    none 
_exptl_absorpt_correction_T_min   ?
_exptl_absorpt_correction_T_max   ? 
_exptl_absorpt_process_details    ? 
 
_exptl_special_details 
; 
 ? 
; 
 
_diffrn_ambient_temperature       293(2) 
_diffrn_radiation_wavelength      0.72080 
_diffrn_radiation_type            ? 
_diffrn_radiation_source          'fine-focus sealed tube' 
_diffrn_radiation_monochromator   graphite 
_diffrn_measurement_device_type   ? 
_diffrn_measurement_method        ? 
_diffrn_detector_area_resol_mean  ? 
_diffrn_standards_number          ? 
_diffrn_standards_interval_count  ? 
_diffrn_standards_interval_time   ? 
_diffrn_standards_decay_%         ? 
_diffrn_reflns_number             310 
_diffrn_reflns_av_R_equivalents   0.0000 
_diffrn_reflns_av_sigmaI/netI     0.0441 
_diffrn_reflns_limit_h_min        0 
_diffrn_reflns_limit_h_max        7 
_diffrn_reflns_limit_k_min        -8 
_diffrn_reflns_limit_k_max        8 
_diffrn_reflns_limit_l_min        0 
_diffrn_reflns_limit_l_max        10 
_diffrn_reflns_theta_min          2.54 
_diffrn_reflns_theta_max          21.10 
_reflns_number_total              312 
_reflns_number_gt                 298 
_reflns_threshold_expression      >2sigma(I) 
 
_computing_data_collection        ? 
_computing_cell_refinement        ? 
_computing_data_reduction         ? 
_computing_structure_solution     'SHELXS-97 (Sheldrick, 1990)' 
_computing_structure_refinement   'SHELXL-97 (Sheldrick, 1997)' 
_computing_molecular_graphics     ? 
_computing_publication_material   ? 
 
_refine_special_details 
; 
 Refinement of F^2^ against ALL reflections.  The weighted R-factor wR and 
 goodness of fit S are based on F^2^, conventional R-factors R are based 
 on F, with F set to zero for negative F^2^. The threshold expression of 
 F^2^ > 2sigma(F^2^) is used only for calculating R-factors(gt) etc. and is 
 not relevant to the choice of reflections for refinement.  R-factors based 
 on F^2^ are statistically about twice as large as those based on F, and R- 
 factors based on ALL data will be even larger. 
; 
 
_refine_ls_structure_factor_coef  Fsqd  
_refine_ls_matrix_type            full 
_refine_ls_weighting_scheme       calc  
_refine_ls_weighting_details 
 'calc w=1/[\s^2^(Fo^2^)+(0.1000P)^2^+0.0000P] where P=(Fo^2^+2Fc^2^)/3' 
_atom_sites_solution_primary      direct 
_atom_sites_solution_secondary    difmap 
_atom_sites_solution_hydrogens    geom 
_refine_ls_hydrogen_treatment     mixed 
_refine_ls_extinction_method      none 
_refine_ls_extinction_coef        ? 
_refine_ls_abs_structure_details 
 'Flack H D (1983), Acta Cryst. A39, 876-881' 
_refine_ls_abs_structure_Flack    -10(10) 
_refine_ls_number_reflns          312 
_refine_ls_number_parameters      68 
_refine_ls_number_restraints      189 
_refine_ls_R_factor_all           0.1910 
_refine_ls_R_factor_gt            0.1857 
_refine_ls_wR_factor_ref          0.4242 
_refine_ls_wR_factor_gt           0.4182 
_refine_ls_goodness_of_fit_ref    3.999 
_refine_ls_restrained_S_all       3.305 
_refine_ls_shift/su_max           0.000 
_refine_ls_shift/su_mean          0.000 
 
loop_ 
 _atom_site_label 
 _atom_site_type_symbol 
 _atom_site_fract_x 
 _atom_site_fract_y 
 _atom_site_fract_z 
 _atom_site_U_iso_or_equiv 
 _atom_site_adp_type 
 _atom_site_occupancy 
 _atom_site_symmetry_multiplicity 
 _atom_site_calc_flag 
 _atom_site_refinement_flags 
 _atom_site_disorder_assembly 
 _atom_site_disorder_group 
C11 C 0.014(4) -0.042(2) 0.0433(13) 0.036(2) Uiso 1 1 d DU . . 
H11 H 0.1382 -0.0188 0.0598 0.043 Uiso 1 1 calc R . . 
C21 C -0.026(4) -0.184(2) -0.0516(15) 0.036(2) Uiso 1 1 d DU . . 
H21 H -0.1508 -0.2177 -0.0546 0.043 Uiso 1 1 calc R . . 
C31 C 0.040(4) -0.137(2) -0.1848(14) 0.036(2) Uiso 1 1 d DU . . 
H31 H 0.1667 -0.1323 -0.1840 0.043 Uiso 1 1 calc R . . 
C41 C -0.007(4) 0.030(2) -0.2250(12) 0.036(2) Uiso 1 1 d DU . . 
H41 H -0.1316 0.0176 -0.2425 0.043 Uiso 1 1 calc R . . 
C51 C 0.026(4) 0.159(2) -0.1232(16) 0.036(2) Uiso 1 1 d DU . . 
H51 H 0.1507 0.1821 -0.1090 0.043 Uiso 1 1 calc R . . 
C61 C -0.047(5) 0.319(2) -0.153(2) 0.036(2) Uiso 1 1 d DU . . 
H61A H -0.1672 0.2959 -0.1778 0.043 Uiso 1 1 calc R . . 
H61B H -0.0407 0.3872 -0.0765 0.043 Uiso 1 1 calc R . . 
O21 O 0.061(4) -0.314(3) -0.0003(19) 0.036(2) Uiso 1 1 d DU . . 
O31 O -0.027(4) -0.261(3) -0.2759(19) 0.036(2) Uiso 1 1 d DU . . 
O11 O 0.079(3) 0.086(2) -0.3424(13) 0.036(2) Uiso 1 1 d DU . . 
O51 O -0.056(4) 0.099(2) -0.0053(14) 0.036(2) Uiso 1 1 d DU . . 
O61 O 0.048(3) 0.403(3) -0.254(2) 0.036(2) Uiso 1 1 d DU . . 
C12 C 0.533(4) 0.455(2) 0.3043(7) 0.036(2) Uiso 1 1 d DU . . 
H12 H 0.6577 0.4616 0.3200 0.043 Uiso 1 1 calc R . . 
C22 C 0.475(4) 0.3178(19) 0.2094(13) 0.036(2) Uiso 1 1 d DU . . 
H22 H 0.3480 0.3058 0.2052 0.043 Uiso 1 1 calc R . . 
C32 C 0.545(4) 0.363(2) 0.0765(14) 0.036(2) Uiso 1 1 d DU . . 
H32 H 0.6716 0.3753 0.0793 0.043 Uiso 1 1 calc R . . 
C42 C 0.482(4) 0.526(2) 0.0375(8) 0.036(2) Uiso 1 1 d DU . . 
H42 H 0.3561 0.5139 0.0289 0.043 Uiso 1 1 calc R . . 
C52 C 0.541(4) 0.6574(19) 0.1388(9) 0.036(2) Uiso 1 1 d DU . . 
H52 H 0.6670 0.6830 0.1370 0.043 Uiso 1 1 calc R . . 
C62 C 0.452(4) 0.815(2) 0.1125(16) 0.036(2) Uiso 1 1 d DU . . 
H62A H 0.3341 0.7843 0.0847 0.043 Uiso 1 1 calc R . . 
H62B H 0.4491 0.8778 0.1916 0.043 Uiso 1 1 calc R . . 
O22 O 0.528(4) 0.166(2) 0.2520(18) 0.036(2) Uiso 1 1 d DU . . 
O32 O 0.486(4) 0.233(3) -0.0081(18) 0.036(2) Uiso 1 1 d DU . . 
O12 O 0.563(3) 0.586(2) -0.0806(10) 0.036(2) Uiso 1 1 d DU . . 
O52 O 0.485(3) 0.6070(19) 0.2639(10) 0.036(2) Uiso 1 1 d DU . . 
O62 O 0.542(3) 0.914(3) 0.017(2) 0.036(2) Uiso 1 1 d DU . . 
 
_geom_special_details 
; 
 All esds (except the esd in the dihedral angle between two l.s. planes) 
 are estimated using the full covariance matrix.  The cell esds are taken 
 into account individually in the estimation of esds in distances, angles 
 and torsion angles; correlations between esds in cell parameters are only 
 used when they are defined by crystal symmetry.  An approximate (isotropic) 
 treatment of cell esds is used for estimating esds involving l.s. planes. 
; 
 
loop_ 
 _geom_bond_atom_site_label_1 
 _geom_bond_atom_site_label_2 
 _geom_bond_distance 
 _geom_bond_site_symmetry_2 
 _geom_bond_publ_flag 
C11 O11 1.414(12) 2 ? 
C11 O51 1.421(11) . ? 
C11 C21 1.535(19) . ? 
C21 O21 1.430(10) . ? 
C21 C31 1.511(13) . ? 
C31 O31 1.441(12) . ? 
C31 C41 1.519(13) . ? 
C41 O11 1.440(15) . ? 
C41 C51 1.497(16) . ? 
C51 O51 1.439(11) . ? 
C51 C61 1.513(16) . ? 
C61 O61 1.416(8) . ? 
O11 C11 1.414(12) 2_554 ? 
C12 O12 1.427(12) 2_665 ? 
C12 O52 1.407(10) . ? 
C12 C22 1.524(19) . ? 
C22 O22 1.423(10) . ? 
C22 C32 1.514(13) . ? 
C32 O32 1.416(12) . ? 
C32 C42 1.534(13) . ? 
C42 O12 1.436(15) . ? 
C42 C52 1.536(16) . ? 
C52 O52 1.416(11) . ? 
C52 C62 1.557(15) . ? 
C62 O62 1.413(8) . ? 
O12 C12 1.427(12) 2_664 ? 
 
loop_ 
 _geom_angle_atom_site_label_1 
 _geom_angle_atom_site_label_2 
 _geom_angle_atom_site_label_3 
 _geom_angle 
 _geom_angle_site_symmetry_1 
 _geom_angle_site_symmetry_3 
 _geom_angle_publ_flag 
O11 C11 O51 106.3(11) 2 . ? 
O11 C11 C21 106.7(14) 2 . ? 
O51 C11 C21 109.2(12) . . ? 
O21 C21 C31 110.8(11) . . ? 
O21 C21 C11 105.0(15) . . ? 
C31 C21 C11 111.0(13) . . ? 
O31 C31 C21 109.5(15) . . ? 
O31 C31 C41 110.5(16) . . ? 
C21 C31 C41 111.8(12) . . ? 
O11 C41 C51 109.6(14) . . ? 
O11 C41 C31 111.7(14) . . ? 
C51 C41 C31 113.9(12) . . ? 
O51 C51 C41 108.9(13) . . ? 
O51 C51 C61 106.1(11) . . ? 
C41 C51 C61 114.6(14) . . ? 
O61 C61 C51 110.4(16) . . ? 
C11 O11 C41 115.0(14) 2_554 . ? 
C11 O51 C51 112.8(12) . . ? 
O12 C12 O52 105.9(11) 2_665 . ? 
O12 C12 C22 105.4(14) 2_665 . ? 
O52 C12 C22 112.0(13) . . ? 
O22 C22 C12 110.5(16) . . ? 
O22 C22 C32 111.2(11) . . ? 
C12 C22 C32 109.9(14) . . ? 
O32 C32 C22 107.8(14) . . ? 
O32 C32 C42 112.8(16) . . ? 
C22 C32 C42 108.1(12) . . ? 
O12 C42 C52 105.2(14) . . ? 
O12 C42 C32 110.7(14) . . ? 
C52 C42 C32 109.5(12) . . ? 
O52 C52 C42 111.5(13) . . ? 
O52 C52 C62 104.6(10) . . ? 
C42 C52 C62 109.7(12) . . ? 
O62 C62 C52 111.2(17) . . ? 
C12 O12 C42 116.1(14) 2_664 . ? 
C12 O52 C52 115.4(9) . . ? 
 
loop_ 
 _geom_torsion_atom_site_label_1 
 _geom_torsion_atom_site_label_2 
 _geom_torsion_atom_site_label_3 
 _geom_torsion_atom_site_label_4 
 _geom_torsion 
 _geom_torsion_site_symmetry_1 
 _geom_torsion_site_symmetry_2 
 _geom_torsion_site_symmetry_3 
 _geom_torsion_site_symmetry_4 
 _geom_torsion_publ_flag 
O11 C11 C21 O21 -70.4(19) 2 . . . ? 
O51 C11 C21 O21 175.2(17) . . . . ? 
O11 C11 C21 C31 169.8(17) 2 . . . ? 
O51 C11 C21 C31 55(2) . . . . ? 
O21 C21 C31 O31 74(3) . . . . ? 
C11 C21 C31 O31 -169(2) . . . . ? 
O21 C21 C31 C41 -163(2) . . . . ? 
C11 C21 C31 C41 -46(2) . . . . ? 
O31 C31 C41 O11 -67(2) . . . . ? 
C21 C31 C41 O11 171(2) . . . . ? 
O31 C31 C41 C51 168(2) . . . . ? 
C21 C31 C41 C51 46(3) . . . . ? 
O11 C41 C51 O51 -178(2) . . . . ? 
C31 C41 C51 O51 -52(3) . . . . ? 
O11 C41 C51 C61 63(2) . . . . ? 
C31 C41 C51 C61 -170.7(19) . . . . ? 
O51 C51 C61 O61 169(3) . . . . ? 
C41 C51 C61 O61 -70(3) . . . . ? 
C51 C41 O11 C11 -142.3(19) . . . 2_554 ? 
C31 C41 O11 C11 91(2) . . . 2_554 ? 
O11 C11 O51 C51 -179.7(18) 2 . . . ? 
C21 C11 O51 C51 -65(2) . . . . ? 
C41 C51 O51 C11 63(2) . . . . ? 
C61 C51 O51 C11 -173.4(19) . . . . ? 
O12 C12 C22 O22 -66(2) 2_665 . . . ? 
O52 C12 C22 O22 179.0(17) . . . . ? 
O12 C12 C22 C32 170.5(17) 2_665 . . . ? 
O52 C12 C22 C32 56(2) . . . . ? 
O22 C22 C32 O32 58(3) . . . . ? 
C12 C22 C32 O32 -180(2) . . . . ? 
O22 C22 C32 C42 180(2) . . . . ? 
C12 C22 C32 C42 -57(2) . . . . ? 
O32 C32 C42 O12 -68(2) . . . . ? 
C22 C32 C42 O12 172.7(19) . . . . ? 
O32 C32 C42 C52 176(2) . . . . ? 
C22 C32 C42 C52 57(2) . . . . ? 
O12 C42 C52 O52 -174.1(18) . . . . ? 
C32 C42 C52 O52 -55(2) . . . . ? 
O12 C42 C52 C62 70(2) . . . . ? 
C32 C42 C52 C62 -170.5(16) . . . . ? 
O52 C52 C62 O62 158(2) . . . . ? 
C42 C52 C62 O62 -83(3) . . . . ? 
C52 C42 O12 C12 -147.0(16) . . . 2_664 ? 
C32 C42 O12 C12 94.7(19) . . . 2_664 ? 
O12 C12 O52 C52 -169.2(19) 2_665 . . . ? 
C22 C12 O52 C52 -55(3) . . . . ? 
C42 C52 O52 C12 55(3) . . . . ? 
C62 C52 O52 C12 173.1(19) . . . . ? 
 
_diffrn_measured_fraction_theta_max    0.424 
_diffrn_reflns_theta_full              21.10 
_diffrn_measured_fraction_theta_full   0.424 
_refine_diff_density_max    0.486 
_refine_diff_density_min   -0.597 
_refine_diff_density_rms    0.143 
#==END

data_hald
 
_audit_creation_method            SHELXL-97
_chemical_name_systematic
;
 ?
;
_chemical_name_common             ?
_chemical_melting_point           ?
_chemical_formula_moiety          ?
_chemical_formula_sum
 'C12 H14 D10 O6'
_chemical_formula_weight          274.38
 
loop_
 _atom_type_symbol
 _atom_type_description
 _atom_type_scat_dispersion_real
 _atom_type_scat_dispersion_imag
 _atom_type_scat_source
 'C'  'C'   0.0000   0.0000
 'International Tables Vol C Tables 4.2.6.8 and 6.1.1.4'
 'H'  'H'   0.0000   0.0000
 'International Tables Vol C Tables 4.2.6.8 and 6.1.1.4'
 'D'  'D'   0.0000   0.0000
 'International Tables Vol C Tables 4.2.6.8 and 6.1.1.4'
 'O'  'O'   0.0000   0.0000
 'International Tables Vol C Tables 4.2.6.8 and 6.1.1.4'
 
_symmetry_cell_setting            ?
_symmetry_space_group_name_H-M    ?
 
loop_
 _symmetry_equiv_pos_as_xyz
 'x, y, z'
 '-x, -y, z+1/2'
 
_cell_length_a                    7.784(8)
_cell_length_b                    8.201(8)
_cell_length_c                    10.380(10)
_cell_angle_alpha                 90.00
_cell_angle_beta                  90.00
_cell_angle_gamma                 96.55(5)
_cell_volume                      658.3(11)
_cell_formula_units_Z             2
_cell_measurement_temperature     293(2)
_cell_measurement_reflns_used     ?
_cell_measurement_theta_min       ?
_cell_measurement_theta_max       ?
 
_exptl_crystal_description        ?
_exptl_crystal_colour             ?
_exptl_crystal_size_max           ?
_exptl_crystal_size_mid           ?
_exptl_crystal_size_min           ?
_exptl_crystal_density_meas       ?
_exptl_crystal_density_diffrn     1.384
_exptl_crystal_density_method     'not measured'
_exptl_crystal_F_000              258
_exptl_absorpt_coefficient_mu     0.348
_exptl_absorpt_correction_type    ?
_exptl_absorpt_correction_T_min   ?
_exptl_absorpt_correction_T_max   ?
_exptl_absorpt_process_details    ?
 
_exptl_special_details
;
 ?
;
 
_diffrn_ambient_temperature       293(2)
_diffrn_radiation_wavelength      1.30580
_diffrn_radiation_type            ?
_diffrn_radiation_source          'fine-focus sealed tube'
_diffrn_radiation_monochromator   graphite
_diffrn_measurement_device_type   ?
_diffrn_measurement_method        ?
_diffrn_detector_area_resol_mean  ?
_diffrn_standards_number          ?
_diffrn_standards_interval_count  ?
_diffrn_standards_interval_time   ?
_diffrn_standards_decay_%         ?
_diffrn_reflns_number             216
_diffrn_reflns_av_R_equivalents   0.0000
_diffrn_reflns_av_sigmaI/netI     2.3071
_diffrn_reflns_limit_h_min        0
_diffrn_reflns_limit_h_max        4
_diffrn_reflns_limit_k_min        -4
_diffrn_reflns_limit_k_max        4
_diffrn_reflns_limit_l_min        0
_diffrn_reflns_limit_l_max        11
_diffrn_reflns_theta_min          4.60
_diffrn_reflns_theta_max          45.83
_reflns_number_total              216
_reflns_number_gt                 64
_reflns_threshold_expression      >2sigma(I)
 
_computing_data_collection        ?
_computing_cell_refinement        ?
_computing_data_reduction         ?
_computing_structure_solution     ?
_computing_structure_refinement   'SHELXL-97 (Sheldrick, 1997)'
_computing_molecular_graphics     ?
_computing_publication_material   ?
 
_refine_special_details
;
 Refinement of F^2^ against ALL reflections.  The weighted R-factor wR and
 goodness of fit S are based on F^2^, conventional R-factors R are based
 on F, with F set to zero for negative F^2^. The threshold expression of
 F^2^ > 2sigma(F^2^) is used only for calculating R-factors(gt) etc. and is
 not relevant to the choice of reflections for refinement.  R-factors based
 on F^2^ are statistically about twice as large as those based on F, and R-
 factors based on ALL data will be even larger.
;
 
_refine_ls_structure_factor_coef  Fsqd
_refine_ls_matrix_type            fullcycle
_refine_ls_weighting_scheme       calc
_refine_ls_weighting_details
 'calc w=1/[\s^2^(Fo^2^)+(0.2000P)^2^+0.0000P] where P=(Fo^2^+2Fc^2^)/3'
_atom_sites_solution_primary      direct
_atom_sites_solution_secondary    difmap
_atom_sites_solution_hydrogens    geom
_refine_ls_hydrogen_treatment     mixed
_refine_ls_extinction_method      none
_refine_ls_extinction_coef        ?
_refine_ls_abs_structure_details
 'Flack H D (1983), Acta Cryst. A39, 876-881'
_refine_ls_abs_structure_Flack    10(10)
_refine_ls_number_reflns          216
_refine_ls_number_parameters      102
_refine_ls_number_restraints      89
_refine_ls_R_factor_all           0.2664
_refine_ls_R_factor_gt            0.2095
_refine_ls_wR_factor_ref          0.4272
_refine_ls_wR_factor_gt           0.4170
_refine_ls_goodness_of_fit_ref    1.332
_refine_ls_restrained_S_all       1.154
_refine_ls_shift/su_max           0.340
_refine_ls_shift/su_mean          0.218
 
loop_
 _atom_site_label
 _atom_site_type_symbol
 _atom_site_fract_x
 _atom_site_fract_y
 _atom_site_fract_z
 _atom_site_U_iso_or_equiv
 _atom_site_adp_type
 _atom_site_occupancy
 _atom_site_symmetry_multiplicity
 _atom_site_calc_flag
 _atom_site_refinement_flags
 _atom_site_disorder_assembly
 _atom_site_disorder_group
C11 C 0.0138 -0.0415 0.0433 0.025(4) Uiso 1 1 d D . .
H11 H 0.1382 -0.0188 0.0598 0.030 Uiso 1 1 calc R . .
C21 C -0.0260 -0.1843 -0.0516 0.025(4) Uiso 1 1 d D . .
H21 H -0.1508 -0.2177 -0.0546 0.030 Uiso 1 1 calc R . .
C31 C 0.0403 -0.1369 -0.1848 0.025(4) Uiso 1 1 d D . .
H31 H 0.1667 -0.1323 -0.1840 0.030 Uiso 1 1 calc R . .
C41 C -0.0071 0.0304 -0.2250 0.025(4) Uiso 1 1 d D . .
H41 H -0.1316 0.0176 -0.2425 0.030 Uiso 1 1 calc R . .
C51 C 0.0258 0.1594 -0.1232 0.025(4) Uiso 1 1 d D . .
H51 H 0.1507 0.1821 -0.1090 0.030 Uiso 1 1 calc R . .
C61 C -0.0467 0.3187 -0.1529 0.025(4) Uiso 1 1 d D . .
H61A H -0.1672 0.2959 -0.1778 0.030 Uiso 1 1 calc R . .
H61B H -0.0407 0.3872 -0.0765 0.030 Uiso 1 1 calc R . .
O21 O 0.0609 -0.3144 -0.0003 0.025(4) Uiso 1 1 d D . .
D21A D 0.0366 -0.3194 0.0920 0.038 Uiso 1.0(2) 1 d PD . .
D21B D -0.0001 -0.3537 0.0771 0.038 Uiso 0.0(2) 1 d PD . .
O31 O -0.0268 -0.2607 -0.2759 0.025(4) Uiso 1 1 d D . .
D31 D 0.0475 -0.2400 -0.3517 0.038 Uiso 1 1 d D . .
O11 O 0.0786 0.0865 -0.3424 0.025(4) Uiso 1 1 d D . .
O51 O -0.0556 0.0991 -0.0053 0.025(4) Uiso 1 1 d D . .
O61 O 0.0480 0.4030 -0.2540 0.025(4) Uiso 1 1 d D . .
D61A D -0.0144 0.4924 -0.2850 0.038 Uiso 0.85(18) 1 d PD . .
D61B D 0.0292 0.3391 -0.3329 0.038 Uiso 0.15(18) 1 d PD . .
C12 C 0.5329 0.4548 0.3043 0.025(4) Uiso 1 1 d D . .
H12 H 0.6577 0.4616 0.3200 0.030 Uiso 1 1 calc R . .
C22 C 0.4745 0.3178 0.2094 0.025(4) Uiso 1 1 d D . .
H22 H 0.3480 0.3058 0.2052 0.030 Uiso 1 1 calc R . .
C32 C 0.5449 0.3626 0.0765 0.025(4) Uiso 1 1 d D . .
H32 H 0.6716 0.3753 0.0793 0.030 Uiso 1 1 calc R . .
C42 C 0.4823 0.5263 0.0375 0.025(4) Uiso 1 1 d D . .
H42 H 0.3561 0.5139 0.0289 0.030 Uiso 1 1 calc R . .
C52 C 0.5409 0.6574 0.1388 0.025(4) Uiso 1 1 d D . .
H52 H 0.6670 0.6830 0.1370 0.030 Uiso 1 1 calc R . .
C62 C 0.4523 0.8151 0.1125 0.025(4) Uiso 1 1 d D . .
H62A H 0.3341 0.7843 0.0847 0.030 Uiso 1 1 calc R . .
H62B H 0.4491 0.8778 0.1916 0.030 Uiso 1 1 calc R . .
O22 O 0.5277 0.1664 0.2520 0.025(4) Uiso 1 1 d D . .
D22A D 0.5035 0.1593 0.3448 0.038 Uiso 0.57(14) 1 d PD . .
D22B D 0.4667 0.0793 0.1994 0.038 Uiso 0.43(14) 1 d PD . .
O32 O 0.4865 0.2326 -0.0081 0.025(4) Uiso 1 1 d D . .
D32 D 0.5104 0.2733 -0.0961 0.038 Uiso 1 1 d D . .
O12 O 0.5625 0.5859 -0.0806 0.025(4) Uiso 1 1 d D . .
O52 O 0.4850 0.6070 0.2639 0.025(4) Uiso 1 1 d D . .
O62 O 0.5420 0.9137 0.0169 0.025(4) Uiso 1 1 d D . .
D62A D 0.5184 1.0275 0.0326 0.038 Uiso 0.68(16) 1 d PD . .
D62B D 0.5345 0.8543 -0.0646 0.038 Uiso 0.32(16) 1 d PD . .
 
_geom_special_details
;
 All esds (except the esd in the dihedral angle between two l.s. planes)
 are estimated using the full covariance matrix.  The cell esds are taken
 into account individually in the estimation of esds in distances, angles
 and torsion angles; correlations between esds in cell parameters are only
 used when they are defined by crystal symmetry.  An approximate (isotropic)
 treatment of cell esds is used for estimating esds involving l.s. planes.
;
 
loop_
 _geom_bond_atom_site_label_1
 _geom_bond_atom_site_label_2
 _geom_bond_distance
 _geom_bond_site_symmetry_2
 _geom_bond_publ_flag
C11 O11 1.4140 2 ?
C11 O51 1.4213 . ?
C11 C21 1.5345 . ?
C21 O21 1.4298 . ?
C21 C31 1.5112 . ?
C31 O31 1.4407 . ?
C31 C41 1.5193 . ?
C41 O11 1.4397 . ?
C41 C51 1.4968 . ?
C51 O51 1.4393 . ?
C51 C61 1.5126 . ?
C61 O61 1.4164 . ?
O21 D21B 0.9692 . ?
O21 D21A 0.9766 . ?
D21A D61B 0.9365 2 ?
D21B D61B 0.9724 2 ?
O31 D31 0.9791 . ?
O11 C11 1.4140 2_554 ?
O61 D61B 0.9743 . ?
O61 D61A 0.9794 . ?
D61B D21A 0.9365 2_554 ?
D61B D21B 0.9724 2_554 ?
C12 O52 1.4071 . ?
C12 O12 1.4266 2_665 ?
C12 C22 1.5237 . ?
C22 O22 1.4235 . ?
C22 C32 1.5140 . ?
C32 O32 1.4164 . ?
C32 C42 1.5335 . ?
C42 O12 1.4363 . ?
C42 C52 1.5360 . ?
C52 O52 1.4155 . ?
C52 C62 1.5574 . ?
C62 O62 1.4133 . ?
O22 D22B 0.9779 . ?
O22 D22A 0.9824 . ?
D22A D62B 0.9882 2_665 ?
O32 D32 0.9830 . ?
O12 C12 1.4266 2_664 ?
O62 D62B 0.9747 . ?
O62 D62A 0.9848 . ?
D62B D22A 0.9882 2_664 ?
 
loop_
 _geom_angle_atom_site_label_1
 _geom_angle_atom_site_label_2
 _geom_angle_atom_site_label_3
 _geom_angle
 _geom_angle_site_symmetry_1
 _geom_angle_site_symmetry_3
 _geom_angle_publ_flag
O11 C11 O51 106.3 2 . ?
O11 C11 C21 106.7 2 . ?
O51 C11 C21 109.2 . . ?
O21 C21 C31 110.8 . . ?
O21 C21 C11 105.0 . . ?
C31 C21 C11 111.0 . . ?
O31 C31 C21 109.5 . . ?
O31 C31 C41 110.5 . . ?
C21 C31 C41 111.8 . . ?
O11 C41 C51 109.6 . . ?
O11 C41 C31 111.7 . . ?
C51 C41 C31 113.9 . . ?
O51 C51 C41 108.9 . . ?
O51 C51 C61 106.1 . . ?
C41 C51 C61 114.6 . . ?
O61 C61 C51 110.4 . . ?
D21B O21 D21A 24.2 . . ?
D21B O21 C21 107.5 . . ?
D21A O21 C21 106.9 . . ?
D61B D21A O21 157.5 2 . ?
O21 D21B D61B 150.2 . 2 ?
D31 O31 C31 104.2 . . ?
C11 O11 C41 115.0 2_554 . ?
C11 O51 C51 112.8 . . ?
D61B O61 D61A 94.0 . . ?
D61B O61 C61 108.8 . . ?
D61A O61 C61 109.5 . . ?
D21A D61B D21B 24.5 2_554 2_554 ?
D21A D61B O61 147.0 2_554 . ?
D21B D61B O61 139.9 2_554 . ?
O52 C12 O12 105.9 . 2_665 ?
O52 C12 C22 112.0 . . ?
O12 C12 C22 105.4 2_665 . ?
O22 C22 C32 111.2 . . ?
O22 C22 C12 110.5 . . ?
C32 C22 C12 109.9 . . ?
O32 C32 C22 107.8 . . ?
O32 C32 C42 112.8 . . ?
C22 C32 C42 108.1 . . ?
O12 C42 C32 110.7 . . ?
O12 C42 C52 105.2 . . ?
C32 C42 C52 109.5 . . ?
O52 C52 C42 111.5 . . ?
O52 C52 C62 104.6 . . ?
C42 C52 C62 109.7 . . ?
O62 C62 C52 111.2 . . ?
D22B O22 D22A 115.5 . . ?
D22B O22 C22 107.3 . . ?
D22A O22 C22 106.5 . . ?
O22 D22A D62B 173.2 . 2_665 ?
D32 O32 C32 106.7 . . ?
C12 O12 C42 116.1 2_664 . ?
C12 O52 C52 115.4 . . ?
D62B O62 D62A 127.6 . . ?
D62B O62 C62 109.0 . . ?
D62A O62 C62 107.0 . . ?
O62 D62B D22A 151.9 . 2_664 ?
 
loop_
 _geom_torsion_atom_site_label_1
 _geom_torsion_atom_site_label_2
 _geom_torsion_atom_site_label_3
 _geom_torsion_atom_site_label_4
 _geom_torsion
 _geom_torsion_site_symmetry_1
 _geom_torsion_site_symmetry_2
 _geom_torsion_site_symmetry_3
 _geom_torsion_site_symmetry_4
 _geom_torsion_publ_flag
O11 C11 C21 O21 -70.4 2 . . . ?
O51 C11 C21 O21 175.2 . . . . ?
O11 C11 C21 C31 169.8 2 . . . ?
O51 C11 C21 C31 55.4 . . . . ?
O21 C21 C31 O31 74.5 . . . . ?
C11 C21 C31 O31 -169.3 . . . . ?
O21 C21 C31 C41 -162.7 . . . . ?
C11 C21 C31 C41 -46.4 . . . . ?
O31 C31 C41 O11 -66.8 . . . . ?
C21 C31 C41 O11 170.9 . . . . ?
O31 C31 C41 C51 168.3 . . . . ?
C21 C31 C41 C51 46.0 . . . . ?
O11 C41 C51 O51 -178.0 . . . . ?
C31 C41 C51 O51 -52.0 . . . . ?
O11 C41 C51 C61 63.4 . . . . ?
C31 C41 C51 C61 -170.7 . . . . ?
O51 C51 C61 O61 169.3 . . . . ?
C41 C51 C61 O61 -70.5 . . . . ?
C31 C21 O21 D21B -169.6 . . . . ?
C11 C21 O21 D21B 70.5 . . . . ?
C31 C21 O21 D21A 165.1 . . . . ?
C11 C21 O21 D21A 45.2 . . . . ?
D21B O21 D21A D61B -25.4 . . . 2 ?
C21 O21 D21A D61B 69.9 . . . 2 ?
D21A O21 D21B D61B 18.5 . . . 2 ?
C21 O21 D21B D61B -73.9 . . . 2 ?
C21 C31 O31 D31 -163.2 . . . . ?
C41 C31 O31 D31 73.1 . . . . ?
C51 C41 O11 C11 -142.3 . . . 2_554 ?
C31 C41 O11 C11 90.5 . . . 2_554 ?
O11 C11 O51 C51 -179.7 2 . . . ?
C21 C11 O51 C51 -65.0 . . . . ?
C41 C51 O51 C11 62.8 . . . . ?
C61 C51 O51 C11 -173.4 . . . . ?
C51 C61 O61 D61B 66.3 . . . . ?
C51 C61 O61 D61A 167.7 . . . . ?
D61A O61 D61B D21A -20.0 . . . 2_554 ?
C61 O61 D61B D21A 92.2 . . . 2_554 ?
D61A O61 D61B D21B 20.1 . . . 2_554 ?
C61 O61 D61B D21B 132.3 . . . 2_554 ?
O52 C12 C22 O22 179.0 . . . . ?
O12 C12 C22 O22 -66.4 2_665 . . . ?
O52 C12 C22 C32 55.9 . . . . ?
O12 C12 C22 C32 170.5 2_665 . . . ?
O22 C22 C32 O32 57.7 . . . . ?
C12 C22 C32 O32 -179.6 . . . . ?
O22 C22 C32 C42 180.0 . . . . ?
C12 C22 C32 C42 -57.3 . . . . ?
O32 C32 C42 O12 -68.2 . . . . ?
C22 C32 C42 O12 172.7 . . . . ?
O32 C32 C42 C52 176.2 . . . . ?
C22 C32 C42 C52 57.1 . . . . ?
O12 C42 C52 O52 -174.1 . . . . ?
C32 C42 C52 O52 -55.1 . . . . ?
O12 C42 C52 C62 70.4 . . . . ?
C32 C42 C52 C62 -170.5 . . . . ?
O52 C52 C62 O62 157.7 . . . . ?
C42 C52 C62 O62 -82.5 . . . . ?
C32 C22 O22 D22B -69.8 . . . . ?
C12 C22 O22 D22B 167.9 . . . . ?
C32 C22 O22 D22A 165.9 . . . . ?
C12 C22 O22 D22A 43.6 . . . . ?
D22B O22 D22A D62B -29.6 . . . 2_665 ?
C22 O22 D22A D62B 89.5 . . . 2_665 ?
C22 C32 O32 D32 167.5 . . . . ?
C42 C32 O32 D32 48.2 . . . . ?
C32 C42 O12 C12 94.7 . . . 2_664 ?
C52 C42 O12 C12 -147.0 . . . 2_664 ?
O12 C12 O52 C52 -169.2 2_665 . . . ?
C22 C12 O52 C52 -54.9 . . . . ?
C42 C52 O52 C12 54.6 . . . . ?
C62 C52 O52 C12 173.1 . . . . ?
C52 C62 O62 D62B 64.9 . . . . ?
C52 C62 O62 D62A -153.8 . . . . ?
D62A O62 D62B D22A -15.1 . . . 2_664 ?
C62 O62 D62B D22A 115.9 . . . 2_664 ?
 
_diffrn_measured_fraction_theta_max    0.220
_diffrn_reflns_theta_full              45.83
_diffrn_measured_fraction_theta_full   0.220
_refine_diff_density_max    0.317
_refine_diff_density_min   -0.282
_refine_diff_density_rms    0.084
#==END
